# Supplementary material for: Confinement of silver nanoparticles in polystyrenes through molecular entanglements and their application for catalytic reduction of 4-nitrophenol
Source: Royal Society of Chemistry journal article supplement (doi:10.1039/c9ta06619e), 2019-01-01
Supplement: c9ta06619e1.pdf [file c9ta06619e1.pdf]

## Supporting Information

### Confinements of silver nanoparticles in polystyrenes through molecular entanglements and their application for catalytic reduction of 4-nitrophenol

Ping-Tsung Huang,<sup>\*a</sup> Yu-Ning Chen,<sup>a</sup> Kuan-Chung Chen,<sup>a</sup> Shun-Huei Wu,<sup>a</sup> Ching-Ping Liu<sup>\*a</sup>

<sup>a</sup> Department of Chemistry, Fu Jen Catholic University, 510 Zhongzheng Rd., Xinzhuang District, New Taipei City 24205, Taiwan.

\* E-mail: 073802@mail.fju.edu.tw; 129723@mail.fju.edu.tw. Fax: 886-2-29023209

#### Synthetic procedures of PS-Ag NPs

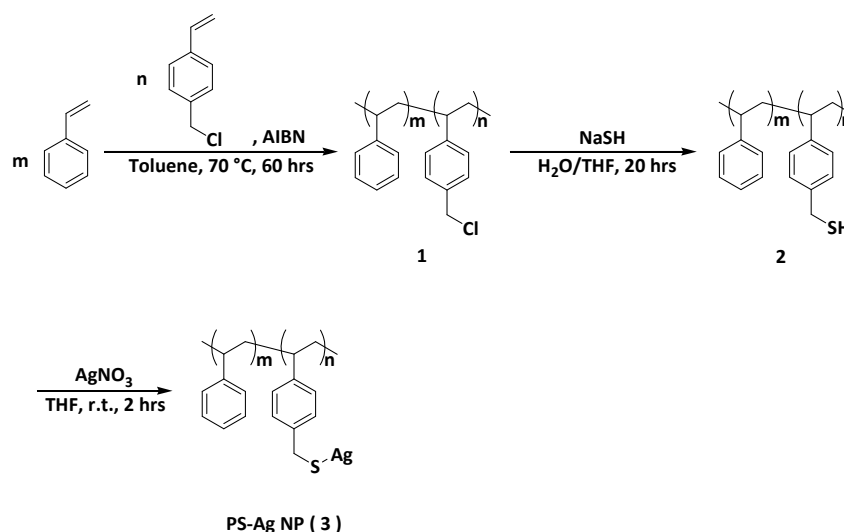

#### Synthesis of poly(styrene-co-4VBCl)(PS-4VBCl) (1)

Styrene (5.148 g, 49.5 mmol) and 4-vinylbenzyl chloride (0.763 g, 5 mmol) were placed in a 20 mL sample vial containing 3 mL toluene. AIBN (0.005 g, 0.03 mmol) was added to the sample vial and reacted at 70 °C for 60 hours. The polymer solution was precipitated from methanol several times to remove unreacted chemicals. The final poly(styrene-co-4VBCl) is dried under vacuum at 50 °C for overnight. White poly(styrene-co-4VBCl) (2.38 g, 40.2%) powder was collected. The ratio of styrene to vinylbenzylchloride in polymer is about 99:1 as revealed by NMR calculation.

### Synthesis of poly(styrene-co-4VBSH) (PS-4VBSH)(2)

Poly(styrene-co-4VBSH) (1 g) was placed in a 250 mL round-bottom flask containing 100 mL THF and 10 mL H<sub>2</sub>O. NaSH (0.028 g, 0.5 mmol) was added to the round bottom flask and reacted at 50°C for 20 hours. The polymer solution was precipitated from methanol several times to remove unreacted NaSH. The final poly(styrene-co-4VBSH) is dried under vacuum at 50°C for overnight. White poly(styrene-co-4VBSH) (0.428 g, 42.8 %) powder was collected. [ $\bar{M}_n = 131,300$ ,  $\bar{M}_w = 244,800$ ].

### Synthesis of PS-Ag NPs (3)

Poly(styrene-co-4VBSH) (1 g) was dissolved in a round-bottom flask containing 30 mL THF. Silver nitrate (0.085 g, 0.5 mmol) was dissolved in 10 mL H<sub>2</sub>O and added to the poly(styrene-co-4VBSH) solution. The mixed solution was stirred at room temperature for 2 hours and precipitate into H<sub>2</sub>O twice. The final PS-Ag NP was dried under vacuum at 50°C for overnight. Lightly grey color PS-Ag NP (0.85 g, 85%) was obtained. The silver content were determined by using ICP-OES.

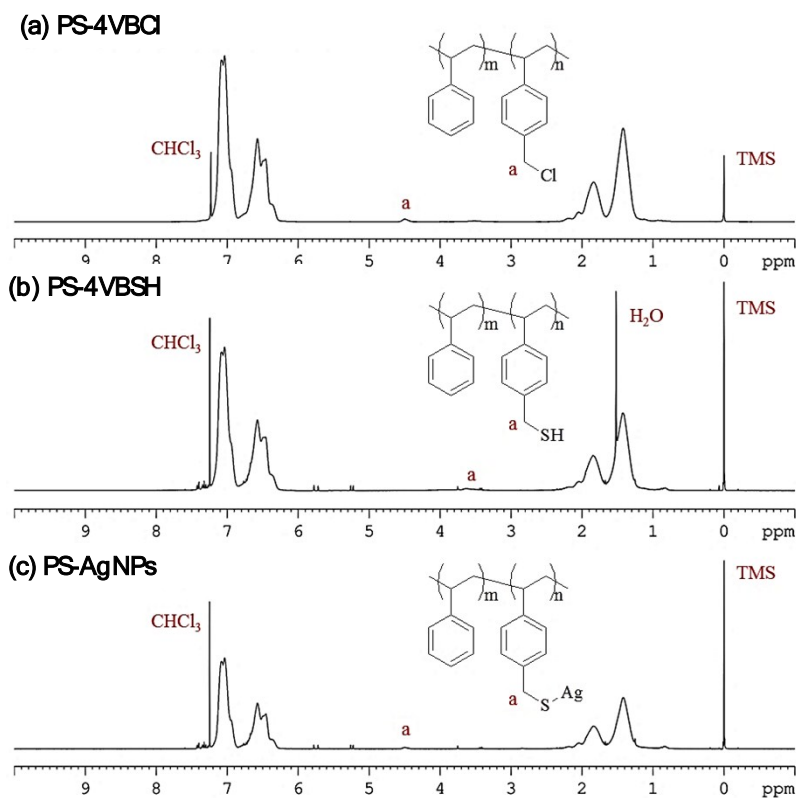

**Fig. S1** NMR spectra of (a) PS-4VBCl, (b) PS-4VBSh, and (c) PS-AgNPs.

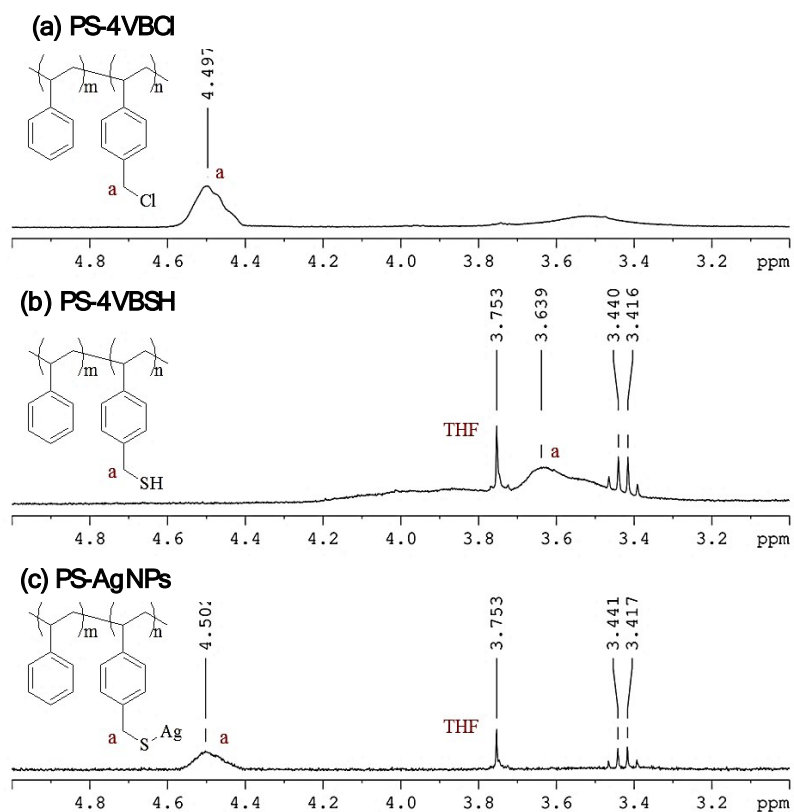

**Fig. S2** NMR spectra of (a) PS-4VBCl, (b) PS-4VBSh, and (c) PS-AgNPs between  $\delta = 3\sim 5$ .

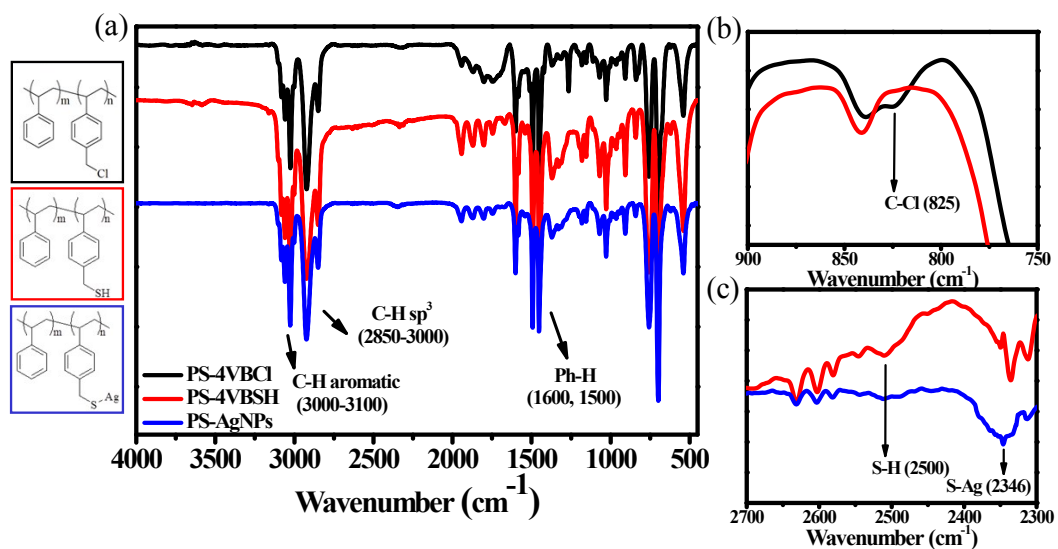

**Fig. S3** FT-IR spectra of (a) PS-4VBCl, PS-4VBSh, and PS-AgNPs (b) characteristic peak of C-Cl (c) characteristic peak of S-H and S-Ag.

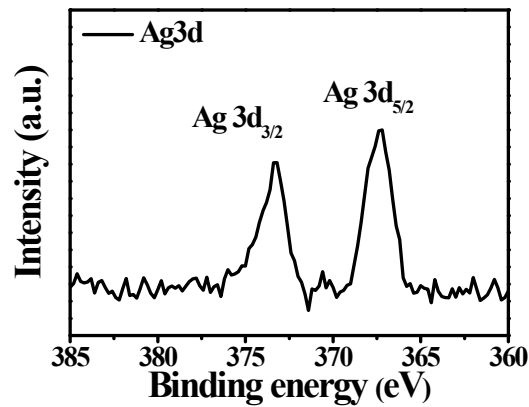

**Fig. S4** The XPS spectrum of Ag3d in H-PS-AgNPs.

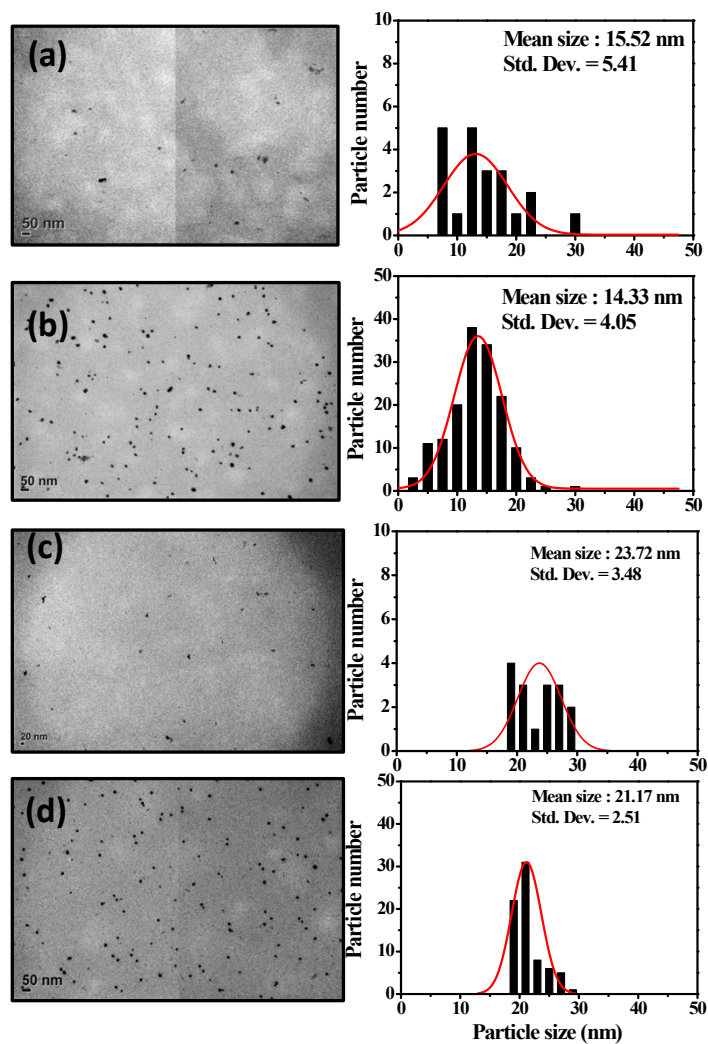

**Fig. S5** TEM photos and particle size distribution of (a) as-cast L-PS-AgNPs (0.102 wt%); (b) as-cast H-PS-AgNPs (0.873 wt%); (c) annealed L-PS-AgNPs (0.102 wt%); (d) annealed H-PS-AgNPs (0.873 wt%).

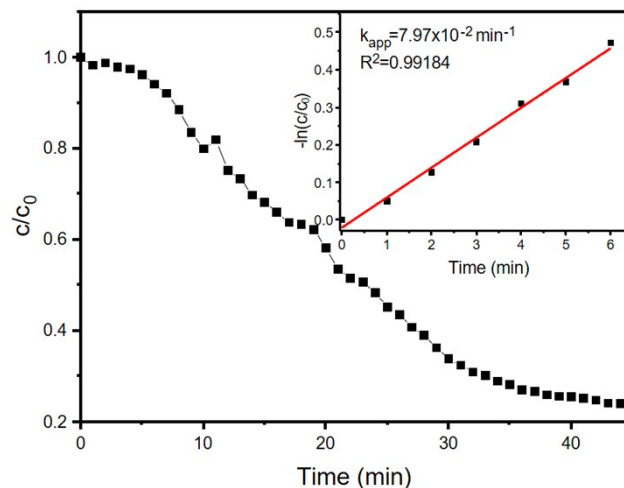

**Fig. S6** The plot of  $c/c_0$  versus time for the catalytic reduction of 4-NP by L-PS-AgNPs. The inset exhibited the linear fitting of the first-order kinetics. [4-NP]= 0.125 mM; [NaBH<sub>4</sub>]= 15 mM; [Ag]=  $5.8 \times 10^{-4} \text{ mg mL}^{-1}$ .

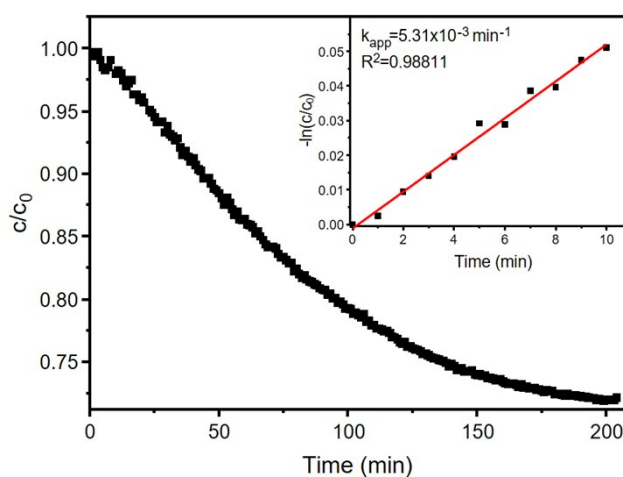

**Fig. S7** The plot of  $c/c_0$  versus time for the catalytic reduction of 4-NP by L-PS-AgNPs. The inset exhibited the linear fitting of the first-order kinetics. [4-NP]= 0.125 mM; [NaBH<sub>4</sub>]= 15 mM; [Ag]=  $5.8 \times 10^{-5} \text{ mg mL}^{-1}$ .

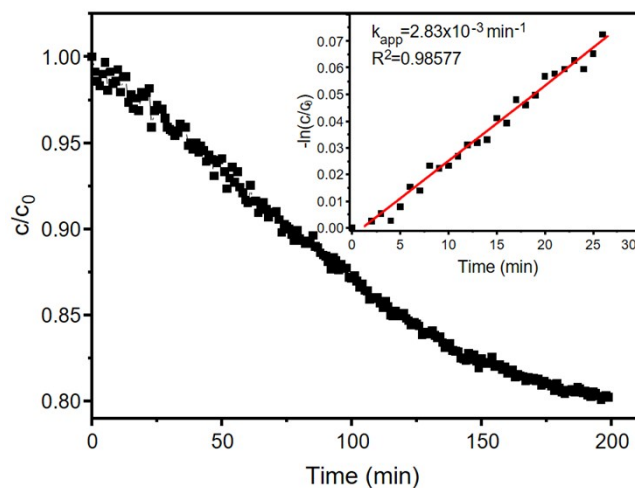

**Fig. S8** The plot of  $c/c_0$  versus time for the catalytic reduction of 4-NP by L-PS-AgNPs. The inset exhibited the linear fitting of the first-order kinetics. [4-NP]= 0.125 mM; [NaBH<sub>4</sub>]= 15 mM; [Ag]= $1.16 \times 10^{-5}$  mg mL<sup>-1</sup>.

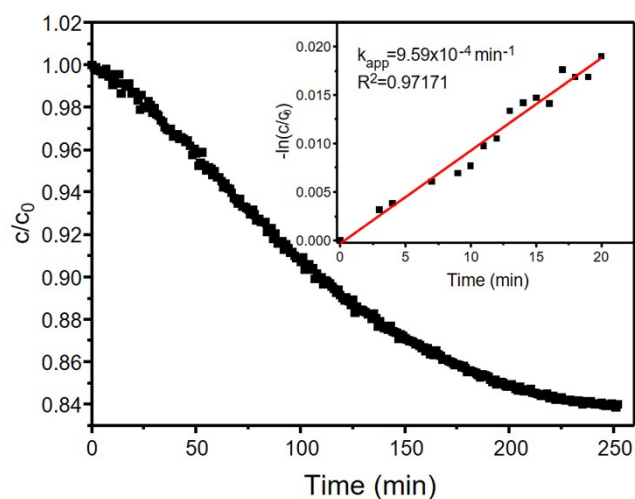

**Fig. S9** The plot of  $c/c_0$  versus time for the catalytic reduction of 4-NP by L-PS-AgNPs. The inset exhibited the linear fitting of the first-order kinetics. [4-NP]= 0.125 mM; [NaBH<sub>4</sub>]= 15 mM; [Ag]= $1.16 \times 10^{-6}$  mg mL<sup>-1</sup>.

**Table S1** Comparison of different AgNP-based nanocomposites as catalysts with their corresponding linear range of [Ag] for the catalytic reduction of 4-NP.

| Catalysts                           | Linear range of [Ag] (mg mL <sup>-1</sup> )   | The type of AgNP-based composite | Reference |
|-------------------------------------|-----------------------------------------------|----------------------------------|-----------|
| L-PS-AgNPs                          | $5.8 \times 10^{-4} \sim 5.8 \times 10^{-6}$  | Covalent bonding                 | This work |
| AgNPs@PGMA-SH <sup>a</sup>          | $1.3 \times 10^{-4} \sim 5.39 \times 10^{-2}$ |                                  | 52        |
| PEI-AgNPs <sup>b</sup>              | $6.61 \times 10^{-2} \sim 0.343$              |                                  | 66        |
| Chitosan-AgNPs                      | $5.39 \times 10^{-2} \sim 0.269$              |                                  | 67        |
| AgNPs/Triton                        | 0.8 ~ 4                                       | Encapsulation                    | *         |
| AgNPs/CA <sup>c</sup>               | 0.4 ~ 1.6                                     |                                  | **        |
| MC-Ag/SiO <sub>2</sub> <sup>d</sup> | $3.4 \times 10^{-4} \sim 6.8 \times 10^{-4}$  |                                  | 53        |

<sup>a</sup> poly (glycidyl methacrylate) denoted as PGMA.

<sup>b</sup> polyimide denoted as PEI.

<sup>c</sup> calcium alginate denoted as CA.

<sup>d</sup> microcapsule denoted as MC, and  $k_{app}$  was proportional to  $[Ag]^2$ .

\* Bano M, Ahirwar D, Thomas M, Naikoo GA, Sheikh MU-D, Khan F, *New J. Chem.* 2016, 40, 6787-6795.

\*\* Saha S, Pal A, Kundu S, Basu S, Pal T, *Langmuir* 2010, 26, 2885-2893.

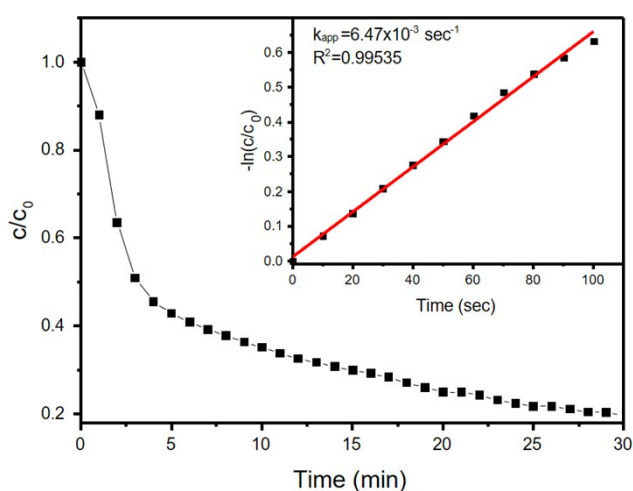

**Fig. S10** The plot of  $c/c_0$  versus time for the catalytic reduction of 4-NP by H-PS-AgNPs. The inset exhibited the linear fitting of the first-order kinetics.  $[4\text{-NP}] = 0.125 \text{ mM}$ ;  $[\text{NaBH}_4] = 50 \text{ mM}$ ;  $[\text{Ag}] = 5.0 \times 10^{-4} \text{ mg mL}^{-1}$ .



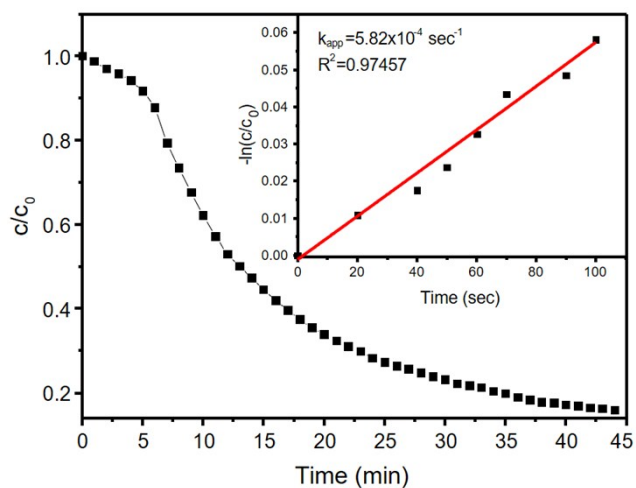

**Fig. S11** The plot of  $c/c_0$  versus time for the catalytic reduction of 4-NP by H-PS-AgNPs. The inset exhibited the linear fitting of the first-order kinetics. [4-NP]= 0.125 mM; [NaBH<sub>4</sub>]= 50 mM; [Ag]= $5.0 \times 10^{-5}$  mg mL<sup>-1</sup>.

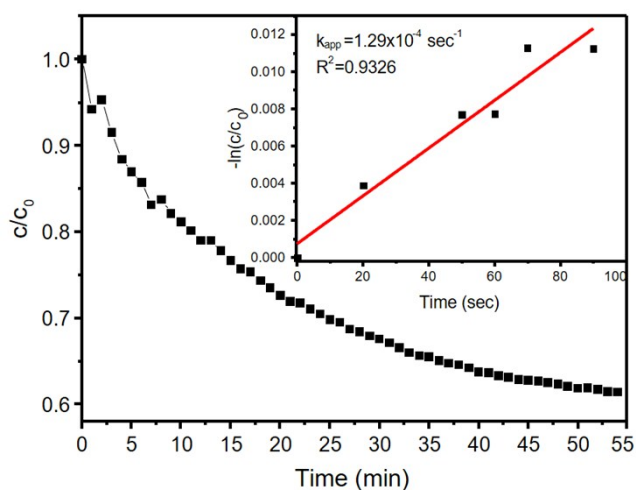

**Fig. S12** The plot of  $c/c_0$  versus time for the catalytic reduction of 4-NP by H-PS-AgNPs. The inset exhibited the linear fitting of the first-order kinetics. [4-NP]= 0.125 mM; [NaBH<sub>4</sub>]= 50 mM; [Ag]= $5.0 \times 10^{-6}$  mg mL<sup>-1</sup>.

**Table S2** The various Ag content in H-PS-AgNPs and L-PS-AgNPs and the corresponding average values of  $t_0$  during the catalytic reaction.

| Catalysts  | [Ag] (mg mL <sup>-1</sup> ) | $t_0$ (min)      |
|------------|-----------------------------|------------------|
| H-PS-AgNPs | $5.0 \times 10^{-4}$        | $0.72 \pm 0.25$  |
|            | $5.0 \times 10^{-5}$        | $3.67 \pm 1.09$  |
|            | $5.0 \times 10^{-6}$        | $3.61 \pm 0.96$  |
| L-PS-AgNPs | $5.8 \times 10^{-4}$        | $15.33 \pm 4.73$ |
|            | $2.9 \times 10^{-4}$        | $25.67 \pm 9.07$ |
|            | $5.8 \times 10^{-5}$        | $28.67 \pm 4.04$ |
|            | $1.2 \times 10^{-5}$        | $43.67 \pm 3.79$ |
|            | $5.8 \times 10^{-6}$        | $49.33 \pm 3.21$ |
